# Supplementary material
Source: PubMed Central journal article supplement (PMC3623232)
Supplement: AEM.03254-12_zam999104261so1.pdf [file AEM.03254-12_zam999104261so1.pdf]

## Electronic Supplementary Materials for

Studies on a blasticidin S deaminase from *Streptomyces lividans* and its application in engineering  
a blasticidin S **producing strain** for easy genetic manipulation

Li Li,<sup>1, 2, †</sup> Wu Jun,<sup>1, †</sup> Deng Zixin,<sup>1</sup> T. Mark Zabriskie,<sup>3</sup> and He Xinyi<sup>1\*</sup>

*State Key Laboratory of Microbial Metabolism, and School of Life Sciences & Biotechnology, Shanghai Jiao Tong University, 1954 Huashan Road, Shanghai, 200030, China,<sup>1</sup> and Engineering Research Center of Industrial Microbiology (Ministry of Education), and College of Life Sciences, Fujian Normal University, Fuzhou, Fujian, 350108, China,<sup>2</sup> and Department of Pharmaceutical Sciences, College of Pharmacy, Oregon State University, Corvallis, OR 97331-3507, USA.<sup>3</sup>*

\* Corresponding author.

Mailing address:

State Key Laboratory of Microbial Metabolism and School of Life Sciences & Biotechnology,  
Shanghai Jiao Tong University, 1954 Huashan Road, Shanghai, 200030, China.

Phone: 86 21 62932943-2121. Fax: 86 21 62932418.

E-mail: xyhe@sjtu.edu.cn.

† L. L. and J. W. contributed equally to the present study.

## Supplementary materials

List of supplementary materials

Table S1-----Table S2 ----- Reference ----- Fig. S1 to S8 & legends

| <b>Table S1. Bacterial strains, plasmids and cosmids</b> |                                                                                                                                                                                                                |                                                                 |
|----------------------------------------------------------|----------------------------------------------------------------------------------------------------------------------------------------------------------------------------------------------------------------|-----------------------------------------------------------------|
| Strain                                                   | Relevant properties                                                                                                                                                                                            | Source or Reference                                             |
| <i>S. lividans</i>                                       |                                                                                                                                                                                                                |                                                                 |
| 66 (NRRL B-16148)                                        | Wild type, Dnd <sup>+</sup> , øHAU3 <sup>r</sup> , SLP2 <sup>+</sup> , SLP3 <sup>+</sup>                                                                                                                       | (1)                                                             |
| HXY16                                                    | <i>S. lividans</i> 66 derivative with genomic island SLG precisely excised at the 15 bp <i>attB</i> site                                                                                                       | (2)                                                             |
| LL1                                                      | <i>S. lividans</i> HXY16 derivative with 12kb fragment insertion containing part of the BS biosynthesis gene cluster and an <i>aadA</i> cassette at the genome                                                 | This study                                                      |
| LL2                                                      | <i>S. lividans</i> LL1 derivative with the whole BS biosynthesis gene cluster inserted into the genome.                                                                                                        | This study                                                      |
| WJ1                                                      | <i>S. lividans</i> HXY16 derivative with <i>SLBSD</i> disruption                                                                                                                                               | This study                                                      |
| WJ2                                                      | <i>S. lividans</i> LL2 derivative with <i>SLBSD</i> disruption                                                                                                                                                 | This study                                                      |
| WJ3                                                      | <i>S. lividans</i> WJ2 derivative with <i>blsL</i> disruption                                                                                                                                                  | This study                                                      |
| WJ4                                                      | <i>S. lividans</i> WJ2 derivative with <i>blsE</i> disruption                                                                                                                                                  | This study                                                      |
| WJ5                                                      | <i>S. lividans</i> WJ2 derivative with <i>blsF</i> disruption                                                                                                                                                  | This study                                                      |
| <i>Streptomyces griseochromogenes</i>                    | Producer of blasticidin S                                                                                                                                                                                      | China General Microbiological culture collection center (CGMCG) |
| <i>Rhodotorula rubra</i>                                 | Indicator strain of blasticidin S                                                                                                                                                                              | Xu Zhinan, personal communication                               |
| <i>Escherichia coli</i>                                  |                                                                                                                                                                                                                |                                                                 |
| DH10B                                                    | F <sup>-</sup> <i>recA lacZ</i> ΔM15                                                                                                                                                                           | GIBCO BRL                                                       |
| ET12567 /pUZ8002                                         | Strain used for conjugation between <i>E. coli</i> and <i>Streptomyces</i> spp. <i>recF</i> , <i>dam</i> , <i>dcm</i> , <i>hsdS</i> , Cml <sup>r</sup> , Str <sup>r</sup> , Tet <sup>r</sup> , Km <sup>r</sup> | (3)                                                             |
| EPI300-T1 <sup>R</sup>                                   | F <sup>-</sup> <i>mcrA</i> □ ( <i>mrr-hsdRMS-mcrBC</i> ) 80d <i>lacZ</i> M15 <i>lacX74 recA1 endA1 araD139 (ara, leu)7697 galU galK - rpsL nupG trfA tonA dhfr</i>                                             | EPICENTRE Biotechnologies                                       |
| BL21(DE3)plysE                                           | F <sup>-</sup> <i>ompT rB- mB- (λDE3) pLysE Cm<sup>r</sup></i>                                                                                                                                                 | Novagen                                                         |
| BW25113                                                  | <i>lacIq</i> <i>rrnBT14</i> Δ <i>lacZ</i> WJ16 <i>hsdR514</i> Δ <i>araBADAH33</i> Δ <i>rha</i> -BADLD78                                                                                                        | the Coli Genetics Stock Center                                  |
| Plasmids                                                 |                                                                                                                                                                                                                |                                                                 |
| pJTU412                                                  | Shuttle cosmid derived from pHZ1358, <i>oriT</i> , <i>ori</i> (ColE1),                                                                                                                                         | (4)                                                             |

|          |                                                                                                                                                                                                               |            |
|----------|---------------------------------------------------------------------------------------------------------------------------------------------------------------------------------------------------------------|------------|
|          | <i>bla</i> , <i>tsr</i> , <i>cos</i> , <i>rep</i> (pIJ101), <i>ori</i> (pIJ101)                                                                                                                               |            |
| pOJ260   | <i>aac(3)IV</i> , <i>oriT</i> , <i>rep<sup>pUC</sup></i> , <i>lacZ</i>                                                                                                                                        | (5)        |
| pJTU1289 | cosmid vector derived from pJTU412, <i>ori</i> (ColE1), <i>bla</i> , <i>tsr</i> , <i>cos</i>                                                                                                                  | (6)        |
| pCC1FOS  | Vector for genomic library                                                                                                                                                                                    | Epicentre  |
| pIJ779   | pBluescript KS(+), <i>aadA</i> , FRT sites                                                                                                                                                                    | (7)        |
| 7D11     | pCC1FOS derived fosmid with insertion from <i>S. griseochromogenes</i> containing 34.5kb fragment of blasticidin S biosynthetic cluster                                                                       | This study |
| pJTU1780 | A 36kb fragment from 7D11 cut by SpeI and XbaI inserted at the SpeI-XbaI site of pJTU1289                                                                                                                     | This study |
| pJTU1528 | pOJ260 with 4.85-kb dispensable fragment of <i>S. lividans</i> HXY16 amplified by Primer ZX1 at EcoRV site                                                                                                    | This study |
| pJTU1785 | pJTU1780 digested with StuI and ligated with an <i>aadA</i> cassette                                                                                                                                          | This study |
| pJTU1786 | A 12kb fragment cut from pJTU1785 by EcoRV inserted at the StuI site of pJTU1528                                                                                                                              | This study |
| pWJ1     | A 2kb fragment amplified from <i>S. lividans</i> HXY16 with primer BKO-UP inserted at the <i>SmaI</i> site of pIJ2925                                                                                         | This study |
| pWJ2     | A 2kb fragment amplified from <i>S. lividans</i> 66 with primer BKO-DOWN inserted at the <i>SmaI</i> site of pIJ2925                                                                                          | This study |
| pWJ3     | Two 2kb <i>XbaI-KpnI</i> fragments from pWJ1 and pWJ2, together with a <i>KpnI-KpnI</i> kan <sup>r</sup> cassette amplified from SuperCos1 with primers <i>Kan-Kf</i> inserted at <i>XbaI</i> site of pJTU412 | This study |
| pWJ4     | <i>SLBSD</i> expression vector, PCR product for <i>SLBSD</i> has NdeI and EcoRI restriction sites at its two ends, which were used for cloning into corresponding sites of pET28a(+)                          | This study |
| pWJ5     | pJTU412 with insertion of a ca. 13kb BglII fragment of the sequenced blasticidin S biosynthetic cluster(from 24646-36677) at the BamHI site                                                                   | This study |
| pWJ6     | The <i>blsE</i> in the pWJ4 substituted by <i>aadA</i> using the PCR-Targeting method                                                                                                                         | This study |
| pWJ7     | The <i>blsL</i> in the pWJ4 substituted by <i>aadA</i> using the PCR-Targeting method                                                                                                                         | This study |
| pWJ8     | The <i>blsF</i> in the pWJ4 substituted by <i>aadA</i> using the PCR-Targeting method                                                                                                                         | This study |

| <b>Table S2. Primers used in this research</b> |                                                                     |                                                                    |
|------------------------------------------------|---------------------------------------------------------------------|--------------------------------------------------------------------|
| Primers                                        | Forward (F)                                                         | Reverse (R)                                                        |
| aadA-T                                         | TCGGCAGCGACATCCTTC                                                  | CGTCATCGAGCGCCATCT                                                 |
| ZX1                                            | TGAGCACCGACACCGAGTT                                                 | GCACCTTCAGGCTGTAGGGA                                               |
| CMPH                                           | GACGGTCTACAACGCCACC                                                 | GCCCAGCCGATCTCCACA                                                 |
| BKO-UP                                         | <u>TCTAGACTGGCCGCCACCGGGAGCCCA</u><br>TACGTCAC                      | <u>GGTACCCGTCTCTGCCTTGTCAGGTGTG</u><br>GTGTCAG                     |
| BKO-D<br>OWN                                   | <u>GGTACCGACCGGACGTCAGAGCGCGAG</u><br>TCCGGTGA                      | <u>TCTAGACTCGGCACCGTCCGGGCCAT</u><br>CGCCG                         |
| Con-BK<br>O                                    | ACCGGCCGACACCTGACACCACACCT                                          | AGCGGGTGCTGGTCCTACCCGACTC                                          |
| KanK                                           | <u>CGGGGTACCCTATTCCAGAAGTAGTGA</u><br>GG                            | <u>CGGGGTACCCTGGATGCCGACGGATTT</u><br>G                            |
| SLBSD                                          | <u>CGGCATATGACCTCGCAGACGAACCCC</u><br>GTCTGA                        | <u>CGGGGATCCTCACCCGGCGTCGAGCTG</u><br>GTGGTCC                      |
| Tar-blsE                                       | AGACCGGCTGCCGCCGGCCACAGGA<br>AGGTTCCGCCATGATTCCGGGGATCCGT<br>CGACC  | GCCTTGACCGATGGGGACCCGGGCCGC<br>TCGGGCGGATCATGTAGGCTGGAGCTG<br>CTTC |
| Tar-blsF                                       | GCCCGGGTCCCCATCGGTCAAGGCGAC<br>AGGAGAGAGATGATTCCGGGGATCCGT<br>CGACC | GGCTGTCCCGCGGACAGCGTGGCGGAT<br>GAGTGGGATTCATGTAGGCTGGAGCTG<br>CTTC |
| Tar-blsL                                       | GGCGGCCAAGACGCTCCGGCAGACACT<br>GGAGTCGCTGTGATTCCGGGGATCCGT<br>CGACC | GTCGTGGACGGGTCGGGCGCGGGGC<br>GGCGCGGGCTCATGTAGGCTGGAGCT<br>GCTTC   |
| Con-blsE                                       | TACGGACCCGGGCCGACATACGTGA                                           | GCCGGCCCCTGCGCCGGGAACGCTT                                          |
| Con-blsF                                       | GGCGTACGGCCGTGGCAGTACTGAT                                           | CGGGTTCGGAAAAACACCTTGCTGGGT                                        |
| Con-blsL                                       | ACCACCAGGGACGTGACGTTCCGGGT                                          | TCCTCCGGTGTCAGCACCTGCGCA                                           |

## Reference

1. **Zhou, X., X. He, A. Li, F. Lei, T. Kieser, and Z. Deng.** 2004. *Streptomyces coelicolor* A3(2) lacks a genomic island present in the chromosome of *Streptomyces lividans* 66. *Appl Environ Microbiol* **70**:7110-7118.
2. **He, X., H. Y. Ou, Q. Yu, X. Zhou, J. Wu, J. Liang, W. Zhang, K. Rajakumar, and Z. Deng.** 2007. Analysis of a genomic island housing genes for DNA S-modification system in *Streptomyces lividans* 66 and its counterparts in other distantly related bacteria. *Mol Microbiol*

65:1034-1048.

3. **Paget, M. S., L. Chamberlin, A. Atrih, S. J. Foster, and M. J. Buttner.** 1999. Evidence that the extracytoplasmic function sigma factor sigmaE is required for normal cell wall structure in *Streptomyces coelicolor* A3(2). *J Bacteriol* **181**:204-211.
4. **Sun, Y., X. He, J. Liang, X. Zhou, and Z. Deng.** 2009. Analysis of functions in plasmid pHZ1358 influencing its genetic and structural stability in *Streptomyces lividans* 1326. *Appl Microbiol Biotechnol* **82**:303-310.
5. **Kieser, T., M. J. Bibb, K. F. Chater, M. J. Butter, and D. A. Hopwood (ed.).** 2000. *Practical Streptomyces genetics*. The John Innes Foundation, United Kingdom, Norwich.
6. **He, Y., Z. Wang, L. Bai, J. Liang, X. Zhou, and Z. Deng.** 2010. Two pHZ1358-derivative vectors for efficient gene knockout in *streptomyces*. *J Microbiol Biotechnol* **20**:678-682.
7. **Gust, B., G. L. Challis, K. Fowler, T. Kieser, and K. F. Chater.** 2003. PCR-targeted *Streptomyces* gene replacement identifies a protein domain needed for biosynthesis of the sesquiterpene soil odor geosmin. *P Natl Acad Sci USA* **100**:1541-1546.

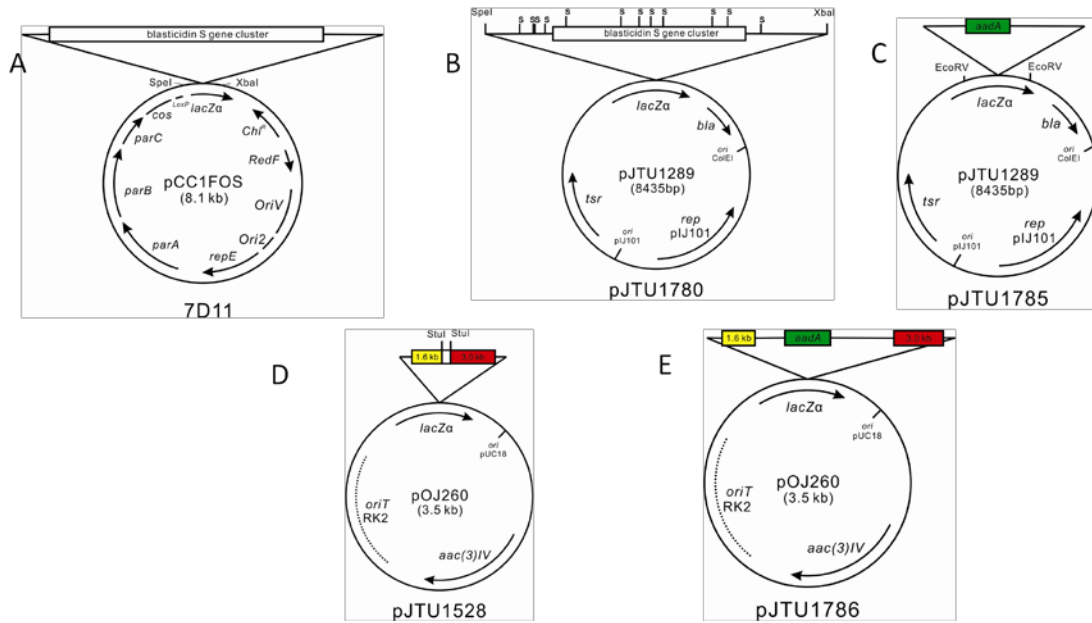

**Figure S1** The maps of the plasmids used in the construction of *S. lividans* LL2. A) The plasmid map of 7D11. it contains a 36 kb SpeI-XbaI fragment harboring the intact blasticidin S gene cluster. B) The plasmid map of pJTU1780. It was generated by the insertion of the 36 kb SpeI-XbaI fragment from 7D11 to the SpeI-XbaI site of pJTU1289. The StuI cleavage sites are marked with the letter “S” in the map. C) The plasmid map of pJTU1785. To generate this plasmid, pJTU1780 was first digested by StuI and was then ligated with an blunt-end *aadA* cassette. D) The plasmid map of pJTU1528. To generate this plasmid, a 4.85 kb fragment was amplified from *S. lividans* HXY16 and was then inserted into the EcoRV site of pOJ260. The yellow part and the red part of the inserted fragment was used as homologue arms in the generation of *S. lividans* LL1. E) The plasmid map of pJTU1786. To generate this plasmid, a EcoRV fragment from pJTU1785 was ligated with the StuI-digested 1528.

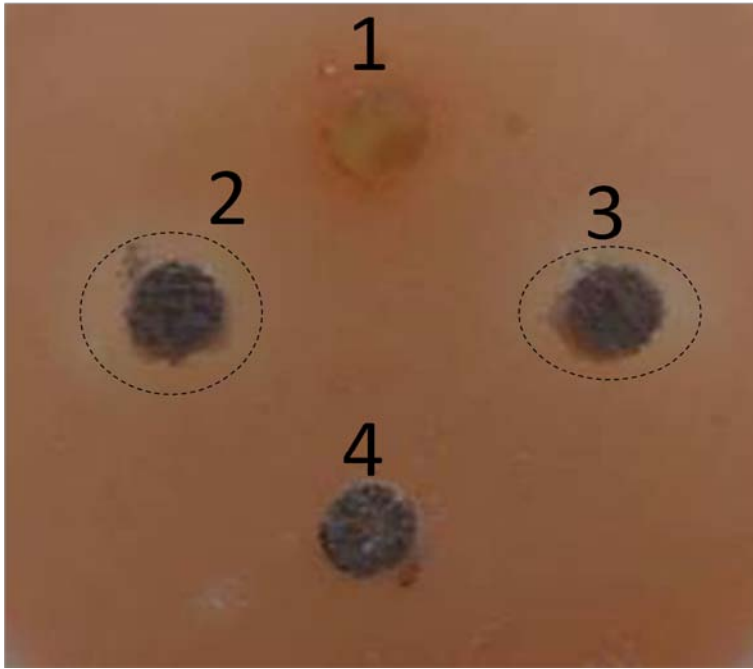

**Figure S2** Bioassay of the bls gene cluster engrafted strain, *S. lividans* LL2. 1, agar patch; 2 and 3, two independent *S. lividans* LL2 strains; 4, *S. lividans* HXY16.

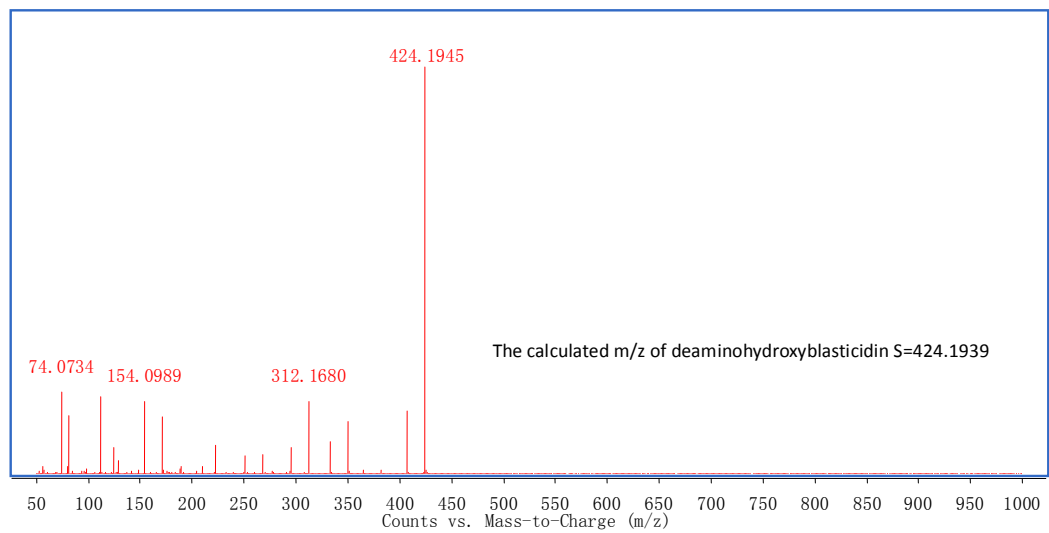

**Figure S3** Q-TOF MS confirmation of deaminohydroxyblastocidin S

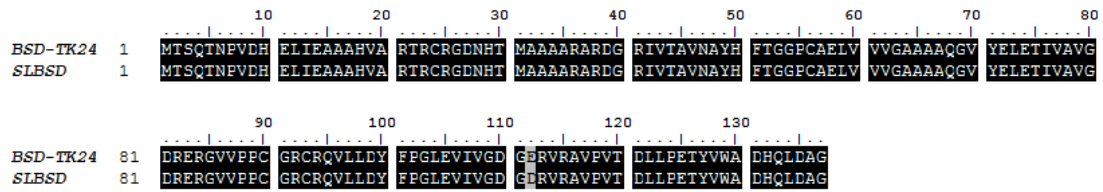

**Figure S4** Protein alignment of SLBSD and its homologue in *S. lividans* TK24.

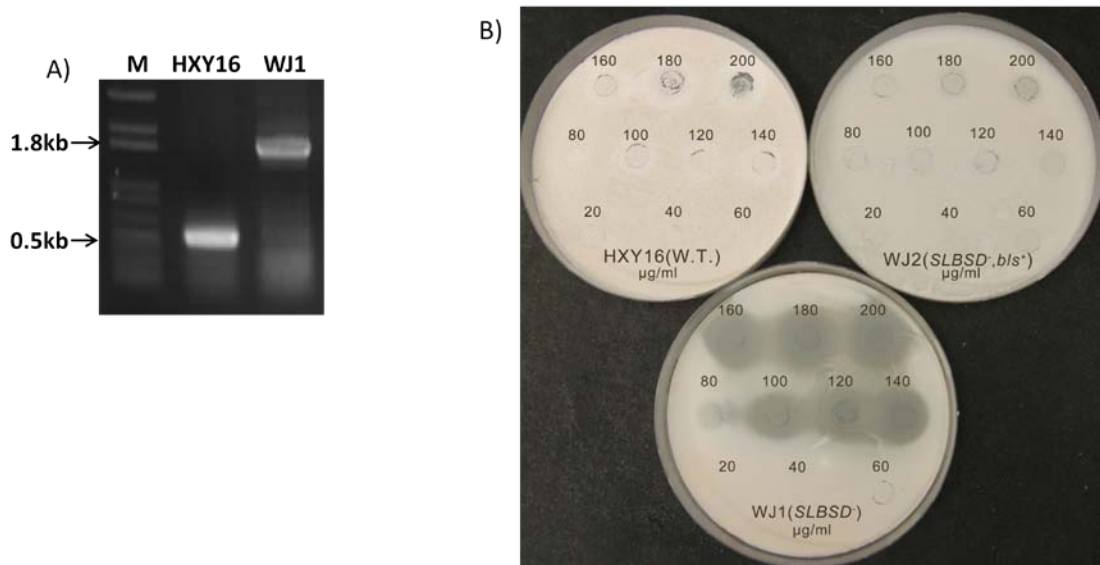

**Figure S5** Confirmation of  $\Delta$ SLBSD mutant *S. lividans* WJ1 and BS resistance experiment of WJ1, WJ2 and HXY16. A) Confirmation of the mutant WJ1 by PCR. M, DNA marker; HXY16, PCR product targeting *SLBSD* from *S. lividans* HXY16; WJ1, PCR product targeting *SLBSD* from *S. lividans* WJ1. B) To test the blasticidin S resistance of each strain, 10 Oxford cups were placed on the SFM medium plates that were pre-inoculated spores of *S. lividans* strains and 25  $\mu$ l blasticidin S with 10 different concentrations (20 - 200 $\mu$ g/ml) was added in the cups. The concentration of blasticidin S was labeled in the Figure. The inhibition effect of blasticidin S on HXY16 could only weaken the growth of the strain, while the growth of WJ1 was completely inhibited when the blasticidin S concentration was over 100 $\mu$ g/ml.



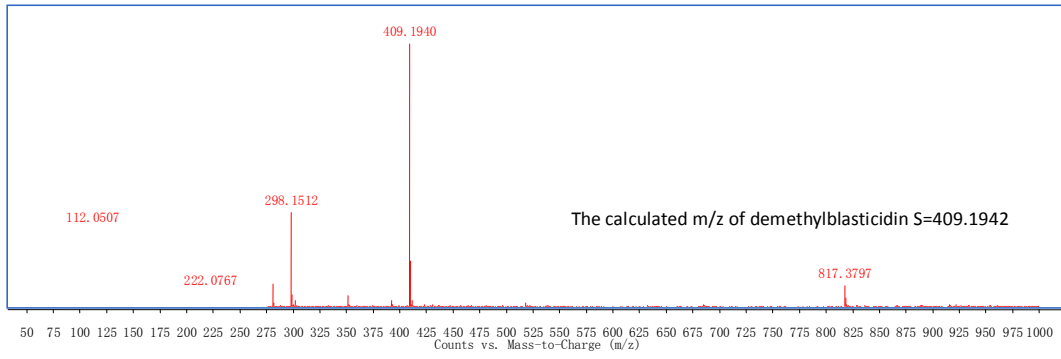

**Figure S6** Q-TOF MS confirmation of demethylblasticidin S

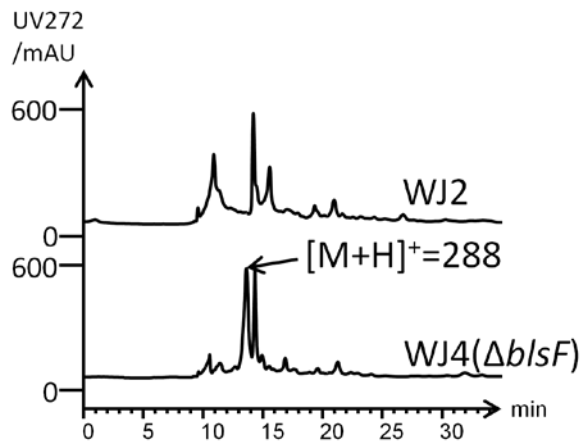

**Figure S7** Assay of the blasticidin S production of the  $\Delta bIsF$  mutant strain, *S. lividans* WJ4. HPLC comparison of the untreated fermentation broth of WJ4 to that of WJ2.

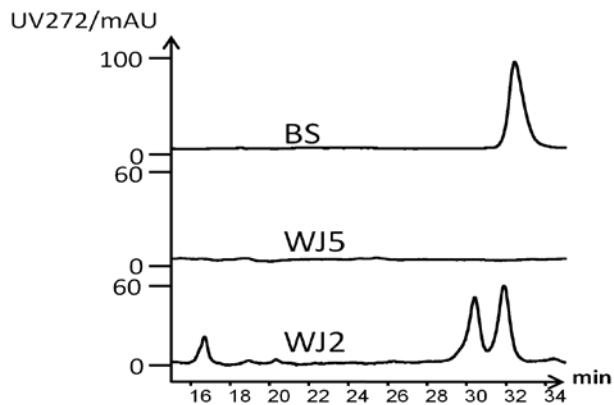

**Figure S8** Assay of the blasticidin S production of the  $\Delta bIsE$  mutant strain, *S. lividans* WJ5.

HPLC comparison of the purified fermentation broth of WJ5 to that of WJ2.
